# Supplementary material
Source: PubMed Central journal article supplement (PMC3730375)
Supplement: Supp_Fig2.pdf [file Supp_Fig2.pdf]

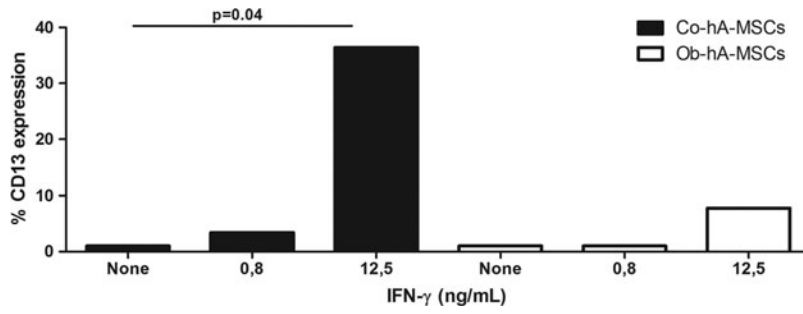

**SUPPLEMENTARY FIG. S2.** CD13 expression on Co- and Ob-hA-MSCs treated with 0.8 ng/mL or 12.5 ng/mL interferon (IFN)- $\gamma$  for 24 h. CD13 expression significantly increased on membranes of Co-hA-MSCs treated with 12.5 ng/mL IFN- $\gamma$  ( $P < 0.05$ ) versus untreated counterpart cells, whereas there was a slight, not significant increase, in treated Ob-hA-MSCs versus untreated cells.
