# Supplementary material
Source: PubMed Central journal article supplement (PMC3730375)
Supplement: Supp_Table2.pdf [file Supp_Table2.pdf]

SUPPLEMENTARY TABLE S2. POLYMERASE CHAIN  
REACTION OLIGONUCLEOTIDE PRIMERS

---

|                       |                          |
|-----------------------|--------------------------|
| CD13 Forward          | GGACAGCGAGTTCGAGGGGGA    |
| CD13 Reverse          | AGTGGCCACCACCTTTCTGACA   |
| PPAR $\gamma$ Forward | CATACATAAAGTCCTTCCCGCTG  |
| PPAR $\gamma$ Reverse | CGAATGGTGATTTGTCTGTTGTCT |
| aP2 Forward           | GGTGGTGGAAATGCGTCATG     |
| aP2 Reverse           | CAACGTCCCTTGGCTTATGC     |
| GAPDH Forward         | GTCGGAGTCAACGGATTTGG     |
| GAPDH Reverse         | AAAAGCAGCCCTGGTGACC      |

---
